# Supplementary material
Source: Research Square preprint supplement (doi:10.21203/rs.3.rs-8987753/v1)
Supplement: Supplementary file 1 [file 72c846f955fee889f823fc87.xlsx]

## Sheet: meta
site	nc_file	lon	lat	depth_m	climatology_from	climatology_to	analysis_from	analysis_to
S_Maria_al_Bagno	cmems_mod_med_phy-temp_my_4.2km_P1D-m_1765532897938.nc	17.9583	40.1458	5.46496	1994-01-01	2010-12-31	2011-01-01	2024-12-31

## Sheet: events_2011_2024
Event N°	Date start	Date peak	Date end	Duration	Intensity mean	Intensity max	Intensity var	Intensity cumulative	Intensity mean (abs)	Intensity max (abs)	Intensity var (abs)	Intensity cum. (abs)
1	2011-09-02	2011-09-19	2011-10-10	39	2.0911	2.8566	0.359	81.5528	25.9045	27.2482	1.1088	1010.28
2	2011-12-05	2011-12-17	2011-12-20	16	1.3026	1.5216	0.169	20.841	16.5142	16.8402	0.2301	264.228
3	2012-03-30	2012-04-07	2012-04-08	10	1.1	1.1755	0.0678	11	15.2663	15.4805	0.1597	152.663
4	2012-07-02	2012-07-03	2012-07-16	15	2.8964	3.4873	0.6489	43.4464	26.9022	27.7226	0.6728	403.534
5	2012-09-03	2012-09-05	2012-09-07	5	1.5334	1.6031	0.0694	7.6668	26.8892	26.9821	0.1393	134.446
6	2012-09-12	2012-09-13	2012-09-16	5	1.2471	1.342	0.0568	6.2353	25.7919	25.989	0.1927	128.959
7	2012-09-30	2012-10-16	2012-10-29	30	1.9213	2.2082	0.1526	57.6399	23.3137	24.6976	0.9121	699.41
8	2012-11-19	2012-11-28	2012-12-05	17	1.4161	1.6594	0.1712	24.0738	18.0243	18.8013	0.6123	306.413
9	2013-09-10	2013-09-12	2013-09-21	12	1.4195	1.5866	0.1126	17.0343	25.8108	26.3331	0.4444	309.73
10	2013-11-04	2013-11-10	2013-11-27	24	1.6844	1.9462	0.1603	40.4254	19.5683	20.763	0.8633	469.64
11	2013-12-01	2013-12-02	2013-12-07	7	1.2964	1.6474	0.2093	9.0751	17.1943	17.7303	0.3566	120.36
12	2013-12-25	2014-02-01	2014-04-13	110	1.5498	2.2796	0.4164	170.475	15.1563	15.9401	0.3429	1667.19
13	2014-10-15	2014-10-22	2014-10-22	8	1.7302	1.9196	0.1889	13.8414	22.7078	22.7912	0.0974	181.662
14	2014-11-28	2014-12-07	2014-12-28	31	1.416	1.7954	0.1645	43.8961	16.646	17.5661	0.6965	516.025
15	2015-01-11	2015-01-22	2015-01-23	13	1.0315	1.2487	0.1122	13.4097	14.5308	14.6188	0.0684	188.9
16	2015-03-04	2015-03-06	2015-03-09	6	1.1257	1.3841	0.1861	6.7541	14.5232	14.7715	0.1844	87.1391
17	2015-06-13	2015-06-14	2015-06-17	5	2.3354	2.5024	0.1378	11.6769	23.8789	23.9914	0.107	119.395
18	2015-07-23	2015-07-26	2015-10-21	91	1.9573	3.0379	0.5735	178.118	26.3094	28.8932	2.0038	2394.16
19	2015-11-20	2015-11-21	2015-11-26	7	1.1912	1.2595	0.0417	8.3382	18.2165	18.5921	0.2728	127.515
20	2015-12-01	2016-01-12	2016-01-19	50	1.3495	1.7809	0.2344	67.4764	15.873	17.2717	0.7226	793.651
21	2016-01-27	2016-02-17	2016-03-04	38	1.2784	1.6244	0.2031	48.5805	14.4615	14.7583	0.2052	549.538
22	2016-03-31	2016-04-16	2016-04-25	26	1.1145	1.4526	0.1396	28.978	15.7503	16.5164	0.5015	409.508
23	2016-11-24	2016-11-28	2016-11-29	6	1.2152	1.2949	0.0732	7.291	17.8618	18.0611	0.2053	107.171
24	2017-02-04	2017-02-06	2017-02-14	11	0.9149	1.0562	0.0913	10.0638	14.0353	14.182	0.0951	154.388
25	2017-02-25	2017-03-01	2017-03-07	11	1.0736	1.1588	0.0651	11.8093	14.3771	14.4535	0.0696	158.149
26	2017-04-10	2017-04-16	2017-04-19	10	1.3242	1.8098	0.3189	13.2418	16.0253	16.5943	0.4288	160.253
27	2017-06-25	2017-06-28	2017-07-02	8	2.4866	2.8326	0.1841	19.8926	25.5836	25.8869	0.2897	204.669
28	2018-02-02	2018-02-03	2018-02-10	9	0.9571	1.1061	0.0797	8.6136	14.0881	14.2578	0.0917	126.793
29	2018-04-23	2018-05-01	2018-05-09	17	2.1563	3.3482	0.6694	36.657	18.1798	19.3459	0.8573	309.057
30	2018-05-14	2018-05-14	2018-05-18	5	2.36	2.7412	0.2524	11.8002	20.0611	20.1929	0.1152	100.305
31	2018-05-31	2018-06-05	2018-06-10	11	3.4165	4.8181	0.751	37.5816	23.6794	25.0819	1.0391	260.474
32	2018-09-03	2018-09-24	2018-09-25	23	1.993	2.9615	0.4629	45.8388	26.515	26.9495	0.2966	609.844
33	2018-11-07	2018-11-13	2018-11-16	10	1.586	1.7236	0.0953	15.8602	19.9285	20.3423	0.3422	199.285
34	2018-11-20	2018-11-26	2018-12-05	16	1.5015	1.9969	0.336	24.0241	18.0557	18.9234	0.7541	288.892
35	2019-03-06	2019-03-11	2019-03-13	8	1.2769	1.517	0.1844	10.2151	14.7353	15.0057	0.1974	117.882
36	2019-03-17	2019-03-26	2019-03-28	12	1.1047	1.2379	0.0683	13.2566	14.8727	15.1062	0.1297	178.473
37	2019-08-31	2019-10-30	2019-12-27	119	2.041	3.327	0.5981	242.88	21.8742	27.4984	3.7419	2603.03
38	2020-01-14	2020-01-20	2020-01-22	9	0.9043	0.9638	0.0491	8.1385	14.3734	14.5013	0.0783	129.361
39	2020-01-26	2020-02-04	2020-02-06	12	1.0591	1.3161	0.1415	12.7089	14.2533	14.4572	0.1232	171.039
40	2020-02-11	2020-02-14	2020-02-17	7	0.8411	0.8963	0.0592	5.8874	13.962	14.0155	0.0544	97.7343
41	2020-03-02	2020-03-03	2020-03-10	9	1.1534	1.3282	0.1045	10.3808	14.5406	14.6539	0.0723	130.865
42	2020-03-19	2020-03-22	2020-03-23	5	1.0931	1.1883	0.0866	5.4654	14.815	14.9372	0.119	74.0752
43	2020-08-29	2020-09-01	2020-09-04	7	1.6284	1.7971	0.1195	11.3986	27.2468	27.4429	0.1975	190.727
44	2020-09-08	2020-09-25	2020-10-08	31	1.9123	2.3737	0.2988	59.2821	25.5432	26.499	0.8678	791.839
45	2020-11-14	2020-12-07	2021-01-15	63	1.3997	1.817	0.2099	88.1832	16.6971	19.4302	1.4996	1051.92
46	2021-01-22	2021-02-08	2021-02-14	24	1.241	1.5221	0.2727	29.7846	14.4329	14.8374	0.2705	346.39
47	2021-02-20	2021-03-02	2021-03-07	16	0.9664	1.1076	0.0754	15.4623	14.2296	14.4129	0.1266	227.673
48	2021-07-12	2021-07-14	2021-07-17	6	2.5426	2.962	0.4062	15.2553	26.9685	27.3553	0.4351	161.811
49	2021-07-27	2021-08-03	2021-09-02	38	2.2802	3.7167	0.6171	86.6473	28.0475	29.2715	0.6061	1065.8
50	2021-09-07	2021-09-21	2021-09-23	17	1.6061	2.3319	0.3868	27.3043	26.0435	26.4648	0.2883	442.739
51	2021-09-27	2021-10-06	2021-10-11	15	1.6302	1.8386	0.1922	24.4526	24.134	24.5019	0.3611	362.01
52	2022-01-05	2022-01-07	2022-01-10	6	1.0567	1.1896	0.1119	6.3404	14.8545	15.0043	0.1382	89.1271
53	2022-02-12	2022-02-21	2022-02-23	12	0.9324	1.1112	0.0976	11.1883	14.0738	14.2749	0.1144	168.886
54	2022-05-24	2022-06-01	2022-06-03	11	2.2952	2.545	0.1963	25.2467	21.6544	22.307	0.5852	238.198
55	2022-06-21	2022-07-02	2022-07-06	16	3.1857	4.6745	0.9253	50.9714	26.2608	28.1098	1.1833	420.174
56	2022-09-04	2022-09-11	2022-09-18	15	1.5167	2.036	0.2669	22.7506	26.3376	26.8803	0.5176	395.064
57	2022-10-29	2023-01-05	2023-01-31	95	1.6256	2.3101	0.288	154.434	17.2213	21.3305	2.092	1636.03
58	2023-02-17	2023-03-11	2023-03-15	27	1.0599	1.2468	0.1031	28.6186	14.3794	14.7446	0.1899	388.245
59	2023-03-24	2023-03-27	2023-03-28	5	1.0718	1.1898	0.113	5.3592	14.9409	15.0897	0.1242	74.7043
60	2023-07-12	2023-07-25	2023-07-27	16	2.9482	4.917	1.1653	47.1709	27.6804	29.9731	1.3624	442.886
61	2023-08-02	2023-08-04	2023-08-07	6	2.1277	2.4485	0.2728	12.7659	27.7571	28.0556	0.2469	166.542
62	2023-09-16	2023-10-28	2023-11-25	71	1.9932	2.9187	0.5077	141.516	22.6552	25.8507	2.2277	1608.52
63	2023-12-02	2023-12-03	2023-12-07	6	1.1364	1.2738	0.0857	6.8186	16.9871	17.2903	0.2479	101.923
64	2023-12-25	2024-01-07	2024-01-23	30	1.4314	1.9851	0.2983	42.9426	15.2319	15.8301	0.4697	456.956
65	2024-02-04	2024-04-16	2024-05-07	94	1.7937	3.0681	0.4351	168.611	15.8735	18.2099	1.252	1492.1
66	2024-07-12	2024-07-14	2024-09-15	66	2.5261	4.1138	0.4897	166.722	27.9019	29.1769	0.7038	1841.53
67	2024-09-24	2024-09-28	2024-09-29	6	1.5191	1.827	0.2519	9.1148	24.8163	24.974	0.0917	148.898
68	2024-10-09	2024-10-29	2024-12-31	84	1.9637	2.3388	0.2141	164.951	19.5904	23.4237	2.4459	1645.59
